# Supplementary material for: Dissecting nutrient-related co-expression networks in phosphate starved poplars
Source: PLoS One. 2017 Feb 21;12(2):e0171958. doi: 10.1371/journal.pone.0171958 (PMC5319788; doi:10.1371/journal.pone.0171958)
Supplement: S2 Table — (XLSX) [file pone.0171958.s003.xlsx]

## Sheet: GO-terms
S2 Table. Overview on the significantly enriched enriched GO terms in all modules. GO terms with p < 0.01 (Benjamini-Hochberg p-value correction) were included. Modules black, grey, purple, red did not contain enriched GO-terms (adj. p <0.01). Go term classes: CC = cellular compartment, BP = biological process, MF = molecular function, Pop.total = number of total genes as background for analysis,…
module.color	ID	name	p.adjusted	Pop_total	Pop_term	Study_total	Study_term	GO-term class
green	GO:0005739	mitochondrion	0.000136217	13718	750	473	55	CC
green	GO:0044455	mitochondrial membrane part	0.000136217	13718	118	473	18	CC
green	GO:0032991	macromolecular complex	0.000225904	13718	1426	473	85	CC
green	GO:0044429	mitochondrial part	0.000521041	13718	257	473	26	CC
green	GO:0031966	mitochondrial membrane	0.000521041	13718	212	473	23	CC
green	GO:0043094	cellular metabolic compound salvage	0.000521041	13718	198	473	22	BP
green	GO:0009853	photorespiration	0.000521041	13718	184	473	21	BP
green	GO:0044424	intracellular part	0.000607963	13718	5390	473	235	CC
green	GO:0005740	mitochondrial envelope	0.000634018	13718	222	473	23	CC
green	GO:0005622	intracellular	0.000634018	13718	5491	473	238	CC
green	GO:0043229	intracellular organelle	0.000751238	13718	4674	473	208	CC
green	GO:0043226	organelle	0.000751238	13718	4678	473	208	CC
green	GO:0006164	purine nucleotide biosynthetic process	0.00104153	13718	97	473	14	BP
green	GO:0080129	proteasome core complex assembly	0.00104153	13718	154	473	18	BP
green	GO:0005746	mitochondrial respiratory chain	0.00123127	13718	62	473	11	CC
green	GO:0005743	mitochondrial inner membrane	0.00164604	13718	177	473	19	CC
green	GO:0044444	cytoplasmic part	0.00164604	13718	3561	473	164	CC
green	GO:0070469	respiratory chain	0.00164604	13718	65	473	11	CC
green	GO:0016036	cellular response to phosphate starvation	0.00184865	13718	105	473	14	BP
green	GO:0072522	purine-containing compound biosynthetic process	0.00196082	13718	106	473	14	BP
green	GO:0005737	cytoplasm	0.00259514	13718	4007	473	179	CC
green	GO:0006511	ubiquitin-dependent protein catabolic process	0.00259514	13718	364	473	29	BP
green	GO:0051788	response to misfolded protein	0.00259514	13718	204	473	20	BP
green	GO:0043248	proteasome assembly	0.00259514	13718	204	473	20	BP
green	GO:0019941	modification-dependent protein catabolic process	0.00259514	13718	366	473	29	BP
green	GO:0043632	modification-dependent macromolecule catabolic process	0.00259514	13718	366	473	29	BP
green	GO:0019374	galactolipid metabolic process	0.00340338	13718	73	473	11	BP
green	GO:0051603	proteolysis involved in cellular protein catabolic process	0.00358419	13718	472	473	34	BP
green	GO:0043231	intracellular membrane-bounded organelle	0.00398914	13718	4268	473	187	CC
green	GO:0031090	organelle membrane	0.00398914	13718	558	473	38	CC
green	GO:0043227	membrane-bounded organelle	0.00398914	13718	4272	473	187	CC
green	GO:0070585	protein localization to mitochondrion	0.00523569	13718	92	473	12	BP
green	GO:0006626	protein targeting to mitochondrion	0.00523569	13718	92	473	12	BP
green	GO:0072655	establishment of protein localization to mitochondrion	0.00523569	13718	92	473	12	BP
green	GO:0043234	protein complex	0.00629231	13718	1016	473	58	CC
green	GO:0005623	cell	0.00629231	13718	6083	473	250	CC
green	GO:0044464	cell part	0.00629231	13718	6083	473	250	CC
green	GO:0030163	protein catabolic process	0.00711779	13718	517	473	35	BP
green	GO:0044257	cellular protein catabolic process	0.00797992	13718	500	473	34	BP
green	GO:0019866	organelle inner membrane	0.00798511	13718	229	473	20	CC
green	GO:0019375	galactolipid biosynthetic process	0.00798511	13718	70	473	10	BP
green	GO:0044267	cellular protein metabolic process	0.00825999	13718	2981	473	136	BP
green	GO:0005749	mitochondrial respiratory chain complex II	0.00825999	13718	4	473	3	CC
green	GO:0045257	succinate dehydrogenase complex (ubiquinone)	0.00825999	13718	4	473	3	CC
green	GO:0045273	respiratory chain complex II	0.00825999	13718	4	473	3	CC
green	GO:0045281	succinate dehydrogenase complex	0.00825999	13718	4	473	3	CC
green	GO:0045283	fumarate reductase complex	0.00825999	13718	4	473	3	CC
green	GO:0019538	protein metabolic process	0.00834094	13718	3221	473	145	BP
green	GO:1901137	carbohydrate derivative biosynthetic process	0.00937952	13718	638	473	40	BP
brown	GO:0007049	cell cycle	8.50564e-15	13718	670	1582	155	BP
brown	GO:0000278	mitotic cell cycle	4.21826e-12	13718	389	1582	100	BP
brown	GO:0022402	cell cycle process	4.21826e-12	13718	489	1582	117	BP
brown	GO:0000910	cytokinesis	2.85159e-11	13718	196	1582	62	BP
brown	GO:0022625	cytosolic large ribosomal subunit	8.9976e-10	13718	127	1582	45	CC
brown	GO:0022626	cytosolic ribosome	8.9976e-10	13718	249	1582	69	CC
brown	GO:0006260	DNA replication	1.0651e-09	13718	235	1582	66	BP
brown	GO:0071897	DNA biosynthetic process	1.0651e-09	13718	235	1582	66	BP
brown	GO:0044445	cytosolic part	1.22897e-09	13718	258	1582	70	CC
brown	GO:0003735	structural constituent of ribosome	1.22897e-09	13718	326	1582	82	MF
brown	GO:0006270	DNA replication initiation	1.24283e-09	13718	140	1582	47	BP
brown	GO:0006261	DNA-dependent DNA replication	1.32757e-09	13718	206	1582	60	BP
brown	GO:0051301	cell division	1.34542e-09	13718	363	1582	88	BP
brown	GO:0000281	mitotic cytokinesis	2.39772e-09	13718	174	1582	53	BP
brown	GO:0000911	cytokinesis by cell plate formation	2.39772e-09	13718	174	1582	53	BP
brown	GO:1902410	mitotic cytokinetic process	2.39772e-09	13718	174	1582	53	BP
brown	GO:0032506	cytokinetic process	2.39772e-09	13718	174	1582	53	BP
brown	GO:0043414	macromolecule methylation	2.39772e-09	13718	478	1582	106	BP
brown	GO:0015934	large ribosomal subunit	3.01254e-09	13718	150	1582	48	CC
brown	GO:0044391	ribosomal subunit	4.07054e-09	13718	274	1582	71	CC
brown	GO:0005840	ribosome	4.33181e-09	13718	338	1582	82	CC
brown	GO:0006259	DNA metabolic process	1.26611e-08	13718	556	1582	116	BP
brown	GO:0005198	structural molecule activity	2.95492e-08	13718	418	1582	93	MF
brown	GO:0030529	ribonucleoprotein complex	3.89149e-08	13718	408	1582	91	CC
brown	GO:0032259	methylation	4.38138e-08	13718	542	1582	112	BP
brown	GO:0051726	regulation of cell cycle	5.2473e-08	13718	250	1582	64	BP
brown	GO:0032991	macromolecular complex	1.83393e-07	13718	1426	1582	236	CC
brown	GO:0043228	non-membrane-bounded organelle	3.50487e-07	13718	642	1582	124	CC
brown	GO:0043232	intracellular non-membrane-bounded organelle	3.50487e-07	13718	642	1582	124	CC
brown	GO:0006275	regulation of DNA replication	3.32979e-06	13718	94	1582	31	BP
brown	GO:0051276	chromosome organization	3.34504e-06	13718	592	1582	113	BP
brown	GO:0044770	cell cycle phase transition	3.81575e-06	13718	58	1582	23	BP
brown	GO:0044772	mitotic cell cycle phase transition	3.81575e-06	13718	58	1582	23	BP
brown	GO:0034968	histone lysine methylation	5.96384e-06	13718	176	1582	46	BP
brown	GO:1901990	regulation of mitotic cell cycle phase transition	8.44555e-06	13718	56	1582	22	BP
brown	GO:1901987	regulation of cell cycle phase transition	8.44555e-06	13718	56	1582	22	BP
brown	GO:0040029	regulation of gene expression, epigenetic	1.04015e-05	13718	374	1582	78	BP
brown	GO:0051567	histone H3-K9 methylation	1.34254e-05	13718	126	1582	36	BP
brown	GO:0000086	G2/M transition of mitotic cell cycle	2.05999e-05	13718	50	1582	20	BP
brown	GO:0010389	regulation of G2/M transition of mitotic cell cycle	2.05999e-05	13718	50	1582	20	BP
brown	GO:0010564	regulation of cell cycle process	2.05999e-05	13718	123	1582	35	BP
brown	GO:0008283	cell proliferation	2.27829e-05	13718	214	1582	51	BP
brown	GO:0016571	histone methylation	2.27829e-05	13718	226	1582	53	BP
brown	GO:0006479	protein methylation	2.92514e-05	13718	234	1582	54	BP
brown	GO:0008213	protein alkylation	2.92514e-05	13718	234	1582	54	BP
brown	GO:0006305	DNA alkylation	3.82599e-05	13718	132	1582	36	BP
brown	GO:0006306	DNA methylation	3.82599e-05	13718	132	1582	36	BP
brown	GO:0006304	DNA modification	4.48168e-05	13718	133	1582	36	BP
brown	GO:0044728	DNA methylation or demethylation	4.48168e-05	13718	133	1582	36	BP
brown	GO:0051052	regulation of DNA metabolic process	4.69576e-05	13718	150	1582	39	BP
brown	GO:0042023	DNA endoreduplication	5.35389e-05	13718	102	1582	30	BP
brown	GO:0044786	cell cycle DNA replication	5.35389e-05	13718	102	1582	30	BP
brown	GO:0016568	chromatin modification	5.40291e-05	13718	379	1582	76	BP
brown	GO:0007346	regulation of mitotic cell cycle	7.27409e-05	13718	88	1582	27	BP
brown	GO:0006325	chromatin organization	8.67447e-05	13718	437	1582	84	BP
brown	GO:0006412	translation	0.000134427	13718	565	1582	102	BP
brown	GO:0003777	microtubule motor activity	0.000182402	13718	62	1582	21	MF
brown	GO:0016570	histone modification	0.000239491	13718	296	1582	61	BP
brown	GO:0016572	histone phosphorylation	0.000372684	13718	55	1582	19	BP
brown	GO:0016458	gene silencing	0.000545275	13718	330	1582	65	BP
brown	GO:0007000	nucleolus organization	0.000801254	13718	19	1582	10	BP
brown	GO:0010605	negative regulation of macromolecule metabolic process	0.000939068	13718	542	1582	95	BP
brown	GO:0000280	nuclear division	0.000939068	13718	84	1582	24	BP
brown	GO:0016569	covalent chromatin modification	0.000992161	13718	350	1582	67	BP
brown	GO:0001510	RNA methylation	0.00112452	13718	202	1582	44	BP
brown	GO:0009892	negative regulation of metabolic process	0.00125641	13718	575	1582	99	BP
brown	GO:0044267	cellular protein metabolic process	0.00166314	13718	2981	1582	407	BP
brown	GO:1902589	single-organism organelle organization	0.00208289	13718	935	1582	147	BP
brown	GO:0003774	motor activity	0.0025402	13718	73	1582	21	MF
brown	GO:0006268	DNA unwinding involved in DNA replication	0.00265382	13718	8	1582	6	BP
brown	GO:0000226	microtubule cytoskeleton organization	0.00266502	13718	197	1582	42	BP
brown	GO:0010629	negative regulation of gene expression	0.00309422	13718	468	1582	82	BP
brown	GO:0005829	cytosol	0.00349577	13718	752	1582	121	CC
brown	GO:0007010	cytoskeleton organization	0.00381458	13718	450	1582	79	BP
brown	GO:0031053	primary miRNA processing	0.00513369	13718	6	1582	5	BP
brown	GO:0007017	microtubule-based process	0.00577117	13718	217	1582	44	BP
brown	GO:0000188	inactivation of MAPK activity	0.00644415	13718	9	1582	6	BP
brown	GO:0033549	MAP kinase phosphatase activity	0.00644415	13718	9	1582	6	MF
brown	GO:0019538	protein metabolic process	0.00674455	13718	3221	1582	430	BP
brown	GO:0001872	(1->3)-beta-D-glucan binding	0.00771007	13718	4	1582	4	MF
brown	GO:0009059	macromolecule biosynthetic process	0.00868691	13718	3355	1582	445	BP
brown	GO:0051225	spindle assembly	0.00868691	13718	38	1582	13	BP
brown	GO:0016779	nucleotidyltransferase activity	0.00920005	13718	127	1582	29	MF
brown	GO:0044238	primary metabolic process	0.00933872	13718	7626	1582	945	BP
brown	GO:0034645	cellular macromolecule biosynthetic process	0.0095059	13718	3244	1582	431	BP
brown	GO:0051603	proteolysis involved in cellular protein catabolic process	0.00968055	13718	472	1582	80	BP
brown	GO:0010498	proteasomal protein catabolic process	0.00992733	13718	230	1582	45	BP
brown	GO:0030332	cyclin binding	0.00992733	13718	59	1582	17	MF
magenta	GO:1901983	regulation of protein acetylation	0.000620648	13718	6	222	4	BP
magenta	GO:2000756	regulation of peptidyl-lysine acetylation	0.000620648	13718	6	222	4	BP
magenta	GO:0035065	regulation of histone acetylation	0.000620648	13718	6	222	4	BP
magenta	GO:0031056	regulation of histone modification	0.00917141	13718	11	222	4	BP
magenta	GO:1902275	regulation of chromatin organization	0.00917141	13718	12	222	4	BP
magenta	GO:0016573	histone acetylation	0.00917141	13718	25	222	5	BP
magenta	GO:0018393	internal peptidyl-lysine acetylation	0.00917141	13718	25	222	5	BP
magenta	GO:0018394	peptidyl-lysine acetylation	0.00917141	13718	25	222	5	BP
magenta	GO:0006475	internal protein amino acid acetylation	0.00917141	13718	25	222	5	BP
turquoise	GO:0019752	carboxylic acid metabolic process	2.53567e-10	13718	1660	2879	467	BP
turquoise	GO:0043436	oxoacid metabolic process	2.53567e-10	13718	1665	2879	467	BP
turquoise	GO:0006082	organic acid metabolic process	2.53567e-10	13718	1666	2879	467	BP
turquoise	GO:0009536	plastid	4.83872e-09	13718	1071	2879	316	CC
turquoise	GO:0032787	monocarboxylic acid metabolic process	6.31445e-08	13718	1127	2879	324	BP
turquoise	GO:0009507	chloroplast	7.5919e-08	13718	878	2879	262	CC
turquoise	GO:0006090	pyruvate metabolic process	1.00467e-06	13718	245	2879	92	BP
turquoise	GO:0015979	photosynthesis	1.28661e-06	13718	374	2879	127	BP
turquoise	GO:0019288	isopentenyl diphosphate biosynthetic process, methylerythritol 4-phosphate pathway	1.28661e-06	13718	244	2879	91	BP
turquoise	GO:0019682	glyceraldehyde-3-phosphate metabolic process	1.28661e-06	13718	244	2879	91	BP
turquoise	GO:0009240	isopentenyl diphosphate biosynthetic process	1.51743e-06	13718	249	2879	92	BP
turquoise	GO:0046490	isopentenyl diphosphate metabolic process	1.51743e-06	13718	249	2879	92	BP
turquoise	GO:0006081	cellular aldehyde metabolic process	2.81017e-06	13718	343	2879	117	BP
turquoise	GO:0044281	small molecule metabolic process	1.93485e-05	13718	2785	2879	688	BP
turquoise	GO:0009657	plastid organization	2.10203e-05	13718	374	2879	122	BP
turquoise	GO:0019684	photosynthesis, light reaction	2.10203e-05	13718	277	2879	96	BP
turquoise	GO:0044255	cellular lipid metabolic process	2.54631e-05	13718	1038	2879	286	BP
turquoise	GO:0006790	sulfur compound metabolic process	3.27179e-05	13718	498	2879	153	BP
turquoise	GO:0044710	single-organism metabolic process	3.98661e-05	13718	5315	2879	1235	BP
turquoise	GO:0006629	lipid metabolic process	4.52454e-05	13718	1198	2879	322	BP
turquoise	GO:0008654	phospholipid biosynthetic process	8.12999e-05	13718	346	2879	112	BP
turquoise	GO:0008299	isoprenoid biosynthetic process	8.73417e-05	13718	424	2879	132	BP
turquoise	GO:0046394	carboxylic acid biosynthetic process	9.62607e-05	13718	997	2879	272	BP
turquoise	GO:0016053	organic acid biosynthetic process	9.62607e-05	13718	997	2879	272	BP
turquoise	GO:0009579	thylakoid	0.000121148	13718	319	2879	104	CC
turquoise	GO:0006631	fatty acid metabolic process	0.000139961	13718	413	2879	128	BP
turquoise	GO:0006644	phospholipid metabolic process	0.000139961	13718	378	2879	119	BP
turquoise	GO:0006720	isoprenoid metabolic process	0.000190715	13718	447	2879	136	BP
turquoise	GO:0044711	single-organism biosynthetic process	0.00020506	13718	2829	2879	686	BP
turquoise	GO:0009069	serine family amino acid metabolic process	0.000224998	13718	267	2879	89	BP
turquoise	GO:0044272	sulfur compound biosynthetic process	0.000314602	13718	440	2879	133	BP
turquoise	GO:0009668	plastid membrane organization	0.000314602	13718	199	2879	70	BP
turquoise	GO:0010027	thylakoid membrane organization	0.000314602	13718	199	2879	70	BP
turquoise	GO:0044436	thylakoid part	0.000370801	13718	301	2879	97	CC
turquoise	GO:1901605	alpha-amino acid metabolic process	0.000622444	13718	498	2879	146	BP
turquoise	GO:0044283	small molecule biosynthetic process	0.000674249	13718	1256	2879	326	BP
turquoise	GO:0009071	serine family amino acid catabolic process	0.000897666	13718	63	2879	29	BP
turquoise	GO:0044435	plastid part	0.000938725	13718	551	2879	158	CC
turquoise	GO:0006546	glycine catabolic process	0.00130327	13718	61	2879	28	BP
turquoise	GO:0009534	chloroplast thylakoid	0.00155209	13718	296	2879	93	CC
turquoise	GO:0031976	plastid thylakoid	0.00155209	13718	296	2879	93	CC
turquoise	GO:0046148	pigment biosynthetic process	0.0015933	13718	277	2879	88	BP
turquoise	GO:0008610	lipid biosynthetic process	0.00163415	13718	837	2879	225	BP
turquoise	GO:0042440	pigment metabolic process	0.00195728	13718	353	2879	107	BP
turquoise	GO:0031984	organelle subcompartment	0.0022014	13718	299	2879	93	CC
turquoise	GO:0031977	thylakoid lumen	0.00232782	13718	63	2879	28	CC
turquoise	GO:0000096	sulfur amino acid metabolic process	0.00295675	13718	321	2879	98	BP
turquoise	GO:0006544	glycine metabolic process	0.00295687	13718	67	2879	29	BP
turquoise	GO:0009543	chloroplast thylakoid lumen	0.00325978	13718	61	2879	27	CC
turquoise	GO:0031978	plastid thylakoid lumen	0.00325978	13718	61	2879	27	CC
turquoise	GO:0006733	oxidoreduction coenzyme metabolic process	0.0036377	13718	249	2879	79	BP
turquoise	GO:0006534	cysteine metabolic process	0.0036377	13718	207	2879	68	BP
turquoise	GO:0044712	single-organism catabolic process	0.00434226	13718	1601	2879	397	BP
turquoise	GO:0019344	cysteine biosynthetic process	0.00474768	13718	205	2879	67	BP
turquoise	GO:0016556	mRNA modification	0.00542868	13718	86	2879	34	BP
turquoise	GO:0051186	cofactor metabolic process	0.00551796	13718	547	2879	152	BP
turquoise	GO:0072330	monocarboxylic acid biosynthetic process	0.00562416	13718	564	2879	156	BP
turquoise	GO:0044434	chloroplast part	0.0058277	13718	490	2879	138	CC
turquoise	GO:0006520	cellular amino acid metabolic process	0.00659906	13718	692	2879	186	BP
turquoise	GO:0044699	single-organism process	0.00856391	13718	8716	2879	1914	BP
turquoise	GO:0009070	serine family amino acid biosynthetic process	0.00942952	13718	210	2879	67	BP
turquoise	GO:0006633	fatty acid biosynthetic process	0.00942952	13718	172	2879	57	BP
turquoise	GO:0005737	cytoplasm	0.00953542	13718	4007	2879	921	CC
turquoise	GO:0034357	photosynthetic membrane	0.00993312	13718	273	2879	83	CC
blue	GO:0044445	cytosolic part	4.89355e-30	13718	258	2075	120	CC
blue	GO:0022626	cytosolic ribosome	2.5034e-29	13718	249	2075	116	CC
blue	GO:0005840	ribosome	5.50596e-25	13718	338	2075	133	CC
blue	GO:0003735	structural constituent of ribosome	1.4443e-24	13718	326	2075	129	MF
blue	GO:0044391	ribosomal subunit	8.5043e-24	13718	274	2075	114	CC
blue	GO:0005198	structural molecule activity	3.47058e-21	13718	418	2075	145	MF
blue	GO:0030529	ribonucleoprotein complex	6.07683e-20	13718	408	2075	140	CC
blue	GO:0001510	RNA methylation	4.77768e-16	13718	202	2075	82	BP
blue	GO:0043228	non-membrane-bounded organelle	9.99415e-16	13718	642	2075	181	CC
blue	GO:0043232	intracellular non-membrane-bounded organelle	9.99415e-16	13718	642	2075	181	CC
blue	GO:0005829	cytosol	6.68764e-15	13718	752	2075	201	CC
blue	GO:0022627	cytosolic small ribosomal subunit	1.5024e-14	13718	107	2075	53	CC
blue	GO:0015935	small ribosomal subunit	1.5024e-14	13718	124	2075	58	CC
blue	GO:0006412	translation	5.99198e-13	13718	565	2075	157	BP
blue	GO:0022625	cytosolic large ribosomal subunit	2.25203e-11	13718	127	2075	54	CC
blue	GO:0002679	respiratory burst involved in defense response	2.60845e-11	13718	124	2075	53	BP
blue	GO:0045730	respiratory burst	2.60845e-11	13718	124	2075	53	BP
blue	GO:0010200	response to chitin	3.63182e-10	13718	364	2075	107	BP
blue	GO:0010243	response to organonitrogen compound	8.1358e-10	13718	378	2075	109	BP
blue	GO:0043414	macromolecule methylation	3.046e-09	13718	478	2075	128	BP
blue	GO:0015934	large ribosomal subunit	3.30035e-09	13718	150	2075	56	CC
blue	GO:0032259	methylation	5.10509e-09	13718	542	2075	140	BP
blue	GO:0009451	RNA modification	1.06364e-08	13718	313	2075	92	BP
blue	GO:0032991	macromolecular complex	2.16054e-06	13718	1426	2075	290	CC
blue	GO:1901698	response to nitrogen compound	8.40966e-05	13718	620	2075	139	BP
blue	GO:0009719	response to endogenous stimulus	0.000455245	13718	1522	2075	292	BP
blue	GO:0010467	gene expression	0.000809619	13718	3090	2075	546	BP
blue	GO:0000502	proteasome complex	0.00127673	13718	64	2075	24	CC
blue	GO:0002252	immune effector process	0.00127673	13718	255	2075	65	BP
blue	GO:0035556	intracellular signal transduction	0.00127673	13718	449	2075	102	BP
blue	GO:0071323	cellular response to chitin	0.00149569	13718	6	2075	6	BP
blue	GO:1901576	organic substance biosynthetic process	0.00269855	13718	5287	2075	884	BP
blue	GO:0006261	DNA-dependent DNA replication	0.00271813	13718	206	2075	54	BP
blue	GO:0006414	translational elongation	0.00271813	13718	55	2075	21	BP
blue	GO:1900673	olefin metabolic process	0.00271813	13718	89	2075	29	BP
blue	GO:1900674	olefin biosynthetic process	0.00271813	13718	89	2075	29	BP
blue	GO:0009692	ethylene metabolic process	0.00271813	13718	89	2075	29	BP
blue	GO:0009693	ethylene biosynthetic process	0.00271813	13718	89	2075	29	BP
blue	GO:0043449	cellular alkene metabolic process	0.00271813	13718	89	2075	29	BP
blue	GO:0043450	alkene biosynthetic process	0.00271813	13718	89	2075	29	BP
blue	GO:0005839	proteasome core complex	0.00293228	13718	26	2075	13	CC
blue	GO:0044249	cellular biosynthetic process	0.00293228	13718	5013	2075	840	BP
blue	GO:0006270	DNA replication initiation	0.00293228	13718	140	2075	40	BP
blue	GO:0006260	DNA replication	0.00342873	13718	235	2075	59	BP
blue	GO:0071897	DNA biosynthetic process	0.00342873	13718	235	2075	59	BP
blue	GO:0009058	biosynthetic process	0.00385239	13718	5466	2075	908	BP
blue	GO:0005544	calcium-dependent phospholipid binding	0.00403914	13718	9	2075	7	MF
blue	GO:0016126	sterol biosynthetic process	0.00433237	13718	172	2075	46	BP
blue	GO:0034645	cellular macromolecule biosynthetic process	0.00433237	13718	3244	2075	561	BP
blue	GO:0009415	response to water	0.00433237	13718	418	2075	93	BP
blue	GO:0009612	response to mechanical stimulus	0.00493384	13718	50	2075	19	BP
blue	GO:0009059	macromolecule biosynthetic process	0.00576679	13718	3355	2075	577	BP
blue	GO:0000160	phosphorelay signal transduction system	0.00608094	13718	165	2075	44	BP
blue	GO:0009414	response to water deprivation	0.00608094	13718	417	2075	92	BP
blue	GO:0016125	sterol metabolic process	0.00694832	13718	181	2075	47	BP
blue	GO:0035383	thioester metabolic process	0.00724591	13718	95	2075	29	BP
blue	GO:0006637	acyl-CoA metabolic process	0.00724591	13718	95	2075	29	BP
blue	GO:0005575	cellular_component	0.00932247	13718	6811	2075	1107	CC
blue	GO:0006084	acetyl-CoA metabolic process	0.00968032	13718	92	2075	28	BP
pink	GO:1901700	response to oxygen-containing compound	3.49809e-06	13718	2108	248	75	BP
pink	GO:0010200	response to chitin	9.9262e-06	13718	364	248	25	BP
pink	GO:0010243	response to organonitrogen compound	1.40279e-05	13718	378	248	25	BP
pink	GO:0009719	response to endogenous stimulus	6.10224e-05	13718	1522	248	56	BP
pink	GO:0010033	response to organic substance	6.10224e-05	13718	2336	248	75	BP
pink	GO:0042221	response to chemical	9.93218e-05	13718	3061	248	90	BP
pink	GO:0009753	response to jasmonic acid	0.000384256	13718	474	248	25	BP
pink	GO:0009694	jasmonic acid metabolic process	0.000384256	13718	164	248	14	BP
pink	GO:0009695	jasmonic acid biosynthetic process	0.00063395	13718	149	248	13	BP
pink	GO:0009725	response to hormone	0.000849409	13718	1363	248	48	BP
pink	GO:1901698	response to nitrogen compound	0.00129845	13718	620	248	28	BP
pink	GO:0009755	hormone-mediated signaling pathway	0.00219881	13718	713	248	30	BP
pink	GO:0009620	response to fungus	0.00280804	13718	445	248	22	BP
pink	GO:0009738	abscisic acid-activated signaling pathway	0.00345545	13718	236	248	15	BP
pink	GO:0032870	cellular response to hormone stimulus	0.00365075	13718	741	248	30	BP
pink	GO:0009723	response to ethylene	0.00383874	13718	332	248	18	BP
pink	GO:0071495	cellular response to endogenous stimulus	0.00383874	13718	748	248	30	BP
pink	GO:0051704	multi-organism process	0.00388775	13718	1476	248	48	BP
pink	GO:0071215	cellular response to abscisic acid stimulus	0.00495606	13718	250	248	15	BP
pink	GO:0006952	defense response	0.00574669	13718	1335	248	44	BP
pink	GO:0097306	cellular response to alcohol	0.00584049	13718	287	248	16	BP
pink	GO:0009611	response to wounding	0.00584049	13718	350	248	18	BP
pink	GO:0042538	hyperosmotic salinity response	0.00676295	13718	149	248	11	BP
pink	GO:0072330	monocarboxylic acid biosynthetic process	0.00703314	13718	564	248	24	BP
pink	GO:0051707	response to other organism	0.00833521	13718	1287	248	42	BP
pink	GO:0009607	response to biotic stimulus	0.00833521	13718	1287	248	42	BP
pink	GO:0071396	cellular response to lipid	0.00990577	13718	339	248	17	BP
pink	GO:0071395	cellular response to jasmonic acid stimulus	0.00990577	13718	309	248	16	BP
pink	GO:0009867	jasmonic acid mediated signaling pathway	0.00990577	13718	309	248	16	BP
pink	GO:1901701	cellular response to oxygen-containing compound	0.00990577	13718	898	248	32	BP
pink	GO:0071310	cellular response to organic substance	0.00990577	13718	1105	248	37	BP
pink	GO:0009751	response to salicylic acid	0.00990577	13718	449	248	20	BP
pink	GO:1900673	olefin metabolic process	0.00990577	13718	89	248	8	BP
pink	GO:1900674	olefin biosynthetic process	0.00990577	13718	89	248	8	BP
pink	GO:0009692	ethylene metabolic process	0.00990577	13718	89	248	8	BP
pink	GO:0009693	ethylene biosynthetic process	0.00990577	13718	89	248	8	BP
pink	GO:0043449	cellular alkene metabolic process	0.00990577	13718	89	248	8	BP
pink	GO:0043450	alkene biosynthetic process	0.00990577	13718	89	248	8	BP
pink	GO:0002376	immune system process	0.00990577	13718	946	248	33	BP
yellow	GO:0009536	plastid	1.23385e-09	13718	1071	1367	179	CC
yellow	GO:0009507	chloroplast	1.23385e-09	13718	878	1367	154	CC
yellow	GO:0005982	starch metabolic process	4.67207e-07	13718	198	1367	50	BP
yellow	GO:0044434	chloroplast part	9.87062e-06	13718	490	1367	89	CC
yellow	GO:0005983	starch catabolic process	9.87062e-06	13718	22	1367	13	BP
yellow	GO:0009251	glucan catabolic process	9.87062e-06	13718	22	1367	13	BP
yellow	GO:0044247	cellular polysaccharide catabolic process	9.87062e-06	13718	22	1367	13	BP
yellow	GO:0015994	chlorophyll metabolic process	1.07235e-05	13718	203	1367	47	BP
yellow	GO:0042440	pigment metabolic process	1.07235e-05	13718	353	1367	69	BP
yellow	GO:0019252	starch biosynthetic process	1.07235e-05	13718	160	1367	40	BP
yellow	GO:0006720	isoprenoid metabolic process	2.0502e-05	13718	447	1367	81	BP
yellow	GO:0006778	porphyrin-containing compound metabolic process	7.19174e-05	13718	231	1367	49	BP
yellow	GO:0033013	tetrapyrrole metabolic process	7.50299e-05	13718	232	1367	49	BP
yellow	GO:0051186	cofactor metabolic process	7.50299e-05	13718	547	1367	92	BP
yellow	GO:0015995	chlorophyll biosynthetic process	8.64901e-05	13718	143	1367	35	BP
yellow	GO:0044435	plastid part	8.64901e-05	13718	551	1367	92	CC
yellow	GO:0005984	disaccharide metabolic process	8.64901e-05	13718	156	1367	37	BP
yellow	GO:0010287	plastoglobule	8.89648e-05	13718	85	1367	25	CC
yellow	GO:0008299	isoprenoid biosynthetic process	9.8678e-05	13718	424	1367	75	BP
yellow	GO:0046148	pigment biosynthetic process	0.000184045	13718	277	1367	54	BP
yellow	GO:0008610	lipid biosynthetic process	0.000188572	13718	837	1367	126	BP
yellow	GO:0000272	polysaccharide catabolic process	0.000209845	13718	47	1367	17	BP
yellow	GO:0044275	cellular carbohydrate catabolic process	0.000209845	13718	29	1367	13	BP
yellow	GO:0006779	porphyrin-containing compound biosynthetic process	0.000347476	13718	167	1367	37	BP
yellow	GO:0009570	chloroplast stroma	0.000347476	13718	187	1367	40	CC
yellow	GO:0015979	photosynthesis	0.000377673	13718	374	1367	66	BP
yellow	GO:0019362	pyridine nucleotide metabolic process	0.000438633	13718	196	1367	41	BP
yellow	GO:0009311	oligosaccharide metabolic process	0.000522084	13718	184	1367	39	BP
yellow	GO:0033014	tetrapyrrole biosynthetic process	0.00052541	13718	171	1367	37	BP
yellow	GO:0072524	pyridine-containing compound metabolic process	0.00052541	13718	205	1367	42	BP
yellow	GO:0071214	cellular response to abiotic stimulus	0.000562266	13718	152	1367	34	BP
yellow	GO:0046496	nicotinamide nucleotide metabolic process	0.00060627	13718	193	1367	40	BP
yellow	GO:0006733	oxidoreduction coenzyme metabolic process	0.00060627	13718	249	1367	48	BP
yellow	GO:0010304	PSII associated light-harvesting complex II catabolic process	0.000649817	13718	28	1367	12	BP
yellow	GO:0051188	cofactor biosynthetic process	0.000831664	13718	274	1367	51	BP
yellow	GO:0010218	response to far red light	0.000851406	13718	117	1367	28	BP
yellow	GO:0006073	cellular glucan metabolic process	0.000918452	13718	350	1367	61	BP
yellow	GO:0044042	glucan metabolic process	0.000918452	13718	350	1367	61	BP
yellow	GO:0000023	maltose metabolic process	0.00122609	13718	126	1367	29	BP
yellow	GO:0006721	terpenoid metabolic process	0.00250209	13718	242	1367	45	BP
yellow	GO:0006629	lipid metabolic process	0.00286631	13718	1198	1367	161	BP
yellow	GO:0007623	circadian rhythm	0.00287434	13718	159	1367	33	BP
yellow	GO:0048511	rhythmic process	0.00287434	13718	159	1367	33	BP
yellow	GO:0006739	NADP metabolic process	0.00291862	13718	187	1367	37	BP
yellow	GO:0009250	glucan biosynthetic process	0.00356453	13718	254	1367	46	BP
yellow	GO:0006098	pentose-phosphate shunt	0.00356453	13718	182	1367	36	BP
yellow	GO:0019684	photosynthesis, light reaction	0.00369562	13718	277	1367	49	BP
yellow	GO:0031969	chloroplast membrane	0.00425199	13718	78	1367	20	CC
yellow	GO:0006740	NADPH regeneration	0.00425199	13718	184	1367	36	BP
yellow	GO:0045962	positive regulation of development, heterochronic	0.00453447	13718	9	1367	6	BP
yellow	GO:0009813	flavonoid biosynthetic process	0.00488823	13718	207	1367	39	BP
yellow	GO:0009812	flavonoid metabolic process	0.00554777	13718	245	1367	44	BP
yellow	GO:0016781	phosphotransferase activity, paired acceptors	0.0067326	13718	4	1367	4	MF
yellow	GO:0009532	plastid stroma	0.00760923	13718	219	1367	40	CC
yellow	GO:0055035	plastid thylakoid membrane	0.00888399	13718	258	1367	45	CC
yellow	GO:0044255	cellular lipid metabolic process	0.00890358	13718	1038	1367	139	BP
